# Supplementary material for: Rapid detection of HPV16 utilizing recombinase polymerase amplification with the employment of an extremely low concentration of the probe
Source: Royal Society of Chemistry journal article supplement (doi:10.1039/d4ay01625d), 2024-01-01
Supplement: d4ay01625d1.pdf [file d4ay01625d1.pdf]

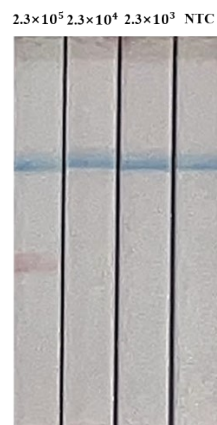

**Figure S1** The sensitivity of RPA-LFS at a concentration of 0.12nM

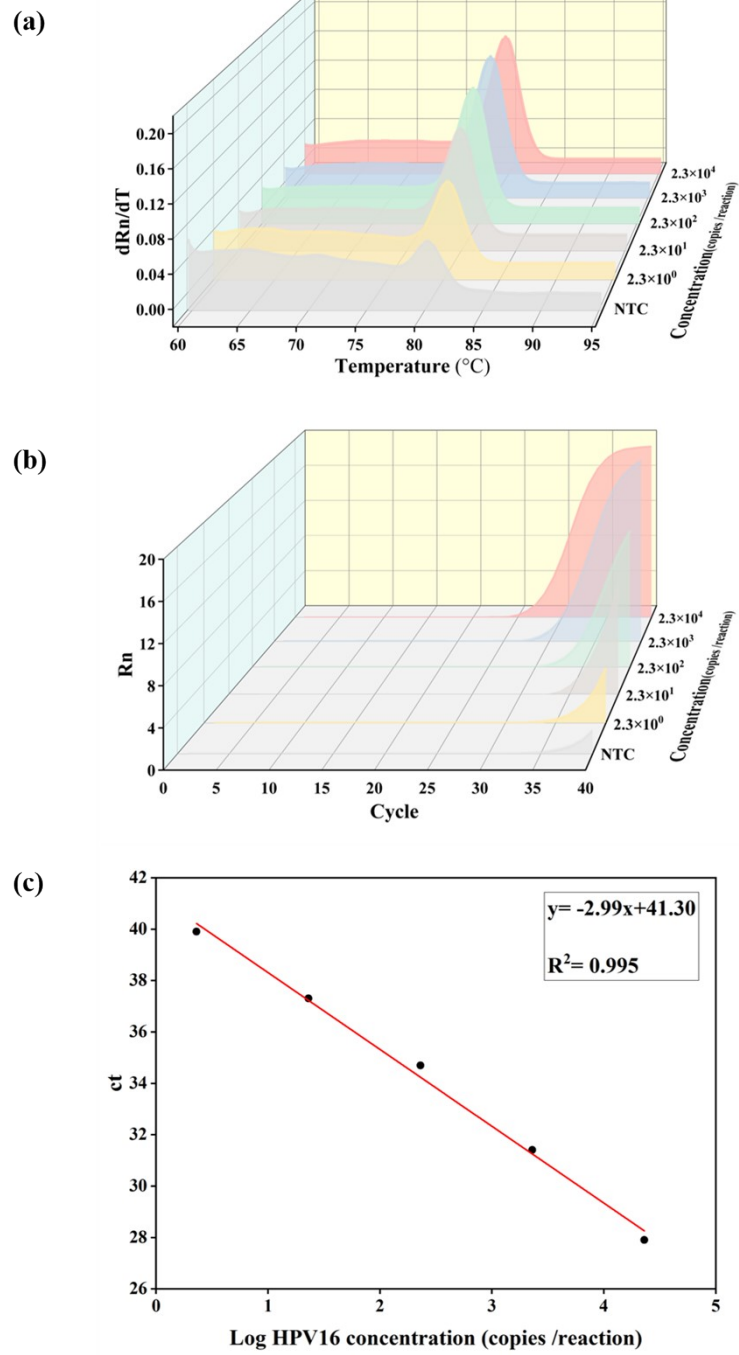

**Figure S2** Sensitivity of qPCR. (a) The amplification curve of qPCR for different amounts. (b) The melting curve of qPCR for different amounts. (c) The standard curve of qPCR.

**Table S1** Misalignments of RPA primer sequences

| Name    | Primer Sequences (5'→3')         |
|---------|----------------------------------|
| L1-4F-3 | TCCTACACCTAGTGGTTCTATGGTTACCTCTG |
| L1-4F-2 | CCTACACCTAGTGGTTCTATGGTTACCTCTGA |
| L1-4F-1 | CTACACCTAGTGGTTCTATGGTTACCTCTGAT |
| L1-4+1  | ACACCTAGTGGTTCTATGGTTACCTCTGATGC |
| L1-4+2  | CACCTAGTGGTTCTATGGTTACCTCTGATGCC |
| L1-4+3  | ACCTAGTGGTTCTATGGTTACCTCTGATGCCC |
| L1-4R-3 | ACAAACCTATAAGTATCTTCTAGTGTGCCTCC |
| L1-4R-2 | CAAACCTATAAGTATCTTCTAGTGTGCCTCCT |
| L1-4R-1 | AAACCTATAAGTATCTTCTAGTGTGCCTCCTG |
| L1-4R+1 | ACCTATAAGTATCTTCTAGTGTGCCTCCTGGG |
| L1-4R+2 | CCTATAAGTATCTTCTAGTGTGCCTCCTGGGG |
| L1-4R+3 | CTATAAGTATCTTCTAGTGTGCCTCCTGGGGG |

**Table S2** qPCR procedure, primer sequences

| Step             | Temperature                      | Time       | Data Collection | Cycle |
|------------------|----------------------------------|------------|-----------------|-------|
| Pre-denaturation | 95                               | 5 min      | None            | 1     |
| Amplification    | 95                               | 20 sec     | None            | 40    |
|                  | 57                               | 40 sec     | Yes             |       |
| Melt Curve       | 60                               | 0.2°C /sec | Yes             |       |
|                  | 95                               |            |                 |       |
| Name             | Sequence (5' →3')                |            |                 |       |
| Forward Primer   | CTACACCTAGTGGTTCTATGGTTACCTCTGAT |            |                 |       |
| Reverse Primer   | AAACCTATAAGTATCTTCTAGTGTGCCTCCTG |            |                 |       |

PCR reactions included 1 µl (10 µM) of forward primer, 1 µl (10 µM) of reverse primer, 25 µl of 2×TransStart® FastPfu PCR SuperMix, 1 µl of template, 0.5 µl of SYBR dye (100×) and 21.5 µl of water.
